# POST-COVID ORTHOPAEDIC ELECTIVE RESOURCE PLANNING USING SIMULATION MODELLING

Alison Harper<sup>1</sup>, Thomas Monks<sup>1</sup>, Rebecca Wilson<sup>2</sup>, Maria Theresa Redaniel<sup>2</sup>, Emily Eyles<sup>2</sup>, Tim Jones<sup>2</sup>, Chris Penfold<sup>3</sup>, Andrew Elliott<sup>4</sup>, Tim Keen<sup>4</sup>, Martin Pitt<sup>1</sup>, Ashley Blom<sup>5</sup>, Michael Whitehouse<sup>4</sup>, and Andrew Judge<sup>3</sup>

<sup>1</sup>The National Institute for Health and Care Research Applied Research Collaboration West (NIHR PenARC) at University of Exeter [a.l.harper@exeter.ac.uk](mailto:a.l.harper@exeter.ac.uk) [t.m.monks@exeter.ac.uk](mailto:t.m.monks@exeter.ac.uk) [m.pitt@exeter.ac.uk](mailto:m.pitt@exeter.ac.uk)

<sup>2</sup>The National Institute for Health and Care Research Applied Research Collaboration West (NIHR ARC West) at University Hospitals Bristol and Weston NHS Foundation Trust, UK; Population Health Sciences, Bristol Medical School, University of Bristol, UK [Rebecca.wilson@bristol.ac.uk](mailto:Rebecca.wilson@bristol.ac.uk) [Theresa.redaniel@bristol.ac.uk](mailto:Theresa.redaniel@bristol.ac.uk) [Emily.eyles@bristol.ac.uk](mailto:Emily.eyles@bristol.ac.uk) [timothy.jones@bristol.ac.uk](mailto:timothy.jones@bristol.ac.uk)

<sup>3</sup>NIHR Biomedical Research Centres University Hospitals Bristol and Weston NHS FT and University of Bristol [Andrew.judge@bristol.ac.uk](mailto:Andrew.judge@bristol.ac.uk) [chris.penfold@bristol.ac.uk](mailto:chris.penfold@bristol.ac.uk)

<sup>4</sup>North Bristol NHS Foundation Trust [tim.keen@nbt.nhs.uk](mailto:tim.keen@nbt.nhs.uk) [Andrew.elliott@nbt.nhs.uk](mailto:Andrew.elliott@nbt.nhs.uk) [Michael.Whitehouse@bristol.ac.uk](mailto:Michael.Whitehouse@bristol.ac.uk)

<sup>5</sup>Faculty of Health, University of Sheffield [a.blom@sheffield.ac.uk](mailto:a.blom@sheffield.ac.uk)

Correspondence to Alison Harper: [a.l.harper@exeter.ac.uk](mailto:a.l.harper@exeter.ac.uk)

Keywords: Orthopedics, Benchmarking, Mobile Applications, Simulation, Elective

Word count: 3274

## ABSTRACT

**Objectives:** To develop a simulation model to support orthopaedic elective capacity planning.

**Methods:** An open-source, generalisable discrete-event simulation was developed, including a web-based application. The model used anonymised patient records between 2016-2019 of elective orthopaedic procedures from an NHS Trust in England. In this paper, it is used to investigate scenarios including resourcing (beds and theatres) and productivity (lengths-of-stay, delayed discharges, theatre activity) to support planning for meeting new NHS targets aimed at reducing elective orthopaedic surgical backlogs in a proposed ring fenced orthopaedic surgical facility. The simulation is interactive and intended for use by health service planners and clinicians.

**Results:** A higher number of beds (65-70) than the proposed number (40 beds) will be required if lengths-of-stay and delayed discharge rates remain unchanged. Reducing lengths-of-stay in line with national benchmarks reduces bed utilisation to an estimated 60%, allowing for additional theatre activity such as weekend working. Further, reducing the proportion of patients with a delayed discharge by 75% reduces bed utilisation to below 40%, even with weekend working. A range of other scenarios can also be investigated directly by NHS planners using the interactive web app.

**Conclusions:** The simulation model is intended to support capacity planning of orthopaedic elective services by identifying a balance of capacity across theatres and beds and predicting the impact of productivity measures on capacity requirements. It is applicable beyond the study site and can be adapted for other specialties.

## Strengths and Limitations of this study:

NOTE: This preprint reports new research that has not been certified by peer review and should not be used to guide clinical practice.

- The simulation model provides rapid quantitative estimates to support post-COVID elective services recovery toward medium-term elective targets.
- Parameter combinations include changes to both resourcing and productivity.
- The interactive web app enables intuitive parameter changes by users while underlying source code can be adapted or re-used for similar applications.
- Patient attributes such as complexity are not included in the model but are reflected in variables such as length-of-stay and delayed discharge rates.
- Theatre schedules are simplified, incorporating the five key orthopaedic elective surgical procedures.

## INTRODUCTION

Elective joint replacement comprises one of the highest volumes of elective procedures worldwide [1]. In the UK, orthopaedics has been the specialty under most pressure in terms of performance against National Health Service (NHS) elective operational standards [2]. Prior to the COVID-19 pandemic, increased waiting times for elective orthopaedic surgery reflected limited NHS resources and the competing demands of rising emergency admissions that affect mixed sites. This has been particularly problematic during the winter months when emergency demand for hospital care is high [3].

Hip and knee replacement have been shown to be strongly cost effective from both a societal and a health system perspective compared to non-surgical treatment [4]. Procedures that are not delayed are more cost effective than delayed intervention, while patients delayed for surgery for more than 180 days have been shown to be at higher risk of poor outcomes [4-6]. Additionally, reviews have found that low surgical volume is associated with longer procedure times and lengths-of-stay, and poorer patient outcomes including risk of revision [7-9]. Given substantial evidence that surgeons undertaking low volumes of specific surgical activities may increase costs and result in less favourable outcomes for patients, Getting it Right First Time (GIRFT) [10] published a set of recommendations, such as ring-fencing beds and improving criteria-led discharge, aimed at reducing the significant variation found in practice. While successful [11], performance against core national standards have continued to deteriorate, attributable to increasing demand and lack of available capacity [2, 12].

The effect of the COVID-19 pandemic on elective orthopaedic services has been to compound ongoing challenges, with larger waiting lists and a steep decline in performance. Following the pandemic, a deterioration has been found in the health of patients who have had elective joint replacement postponed [14]. In response to this situation, the government has committed two-year revenue allocations to support Integrated Care Boards (ICBs) to expand capacity. ICBs and primary and secondary care providers are required to develop plans to meet national objectives and local priorities, in particular to eliminate elective waits of over 65 weeks by March 2024 [15]. While central capital funding will be key to achieving this, maximising use of resources and reducing lengths-of-stay and delayed discharges are required to make effective use of available capacity, and are associated with improvements in patient care [12].

ICBs are therefore currently working to secure capital funds by delivering business cases that evidence optimal capacity and productivity configurations considering activity, workforce, capital requirements and potential revenue. Simulation modelling can be used as a planning tool to provide supporting evidence by modelling various configurations of bed numbers, theatre capacity, and ward stays to estimate resultant surgical throughput. In this paper, we describe the development and implementation of an interactive, free and open-source simulation model to support planning of ring-fenced elective orthopaedic capacity. The model is co-designed with North Bristol NHS Trust (NBT), and is designed to be reusable, generalisable and to provide rapid information for clinicians, business and service managers across a range of scenarios relevant to new orthopaedic capacity planning.

## METHODS

We developed a discrete-event simulation (DES) model (programmed in Python 3.8) of surgical activity and ward stay in a proposed ring-fenced orthopaedic facility. DES allows processes and pathways to be modelled at individual patient level, and to explore the potential impact of changes to the system without the costs and risks associated with real-world changes. It has been used for patient flow management, resource allocation, and scheduling, for example in sexual health [15], stroke pathways [16], and orthopaedics [17-18]. The DES was developed to have the flexibility to answer a range of ‘what-if’ questions of interest to NBT, and is generalisable to other NHS Trusts for orthopaedic elective planning.

The DES model is free and open source, and is available as a web app: <https://hospital-efficiency-project.streamlit.app/>. To preserve code, we have permanently archived it using Zenodo ([HEP | Zenodo](#)). All code has an MIT license allowing free reuse and adaptation by researchers, industry and the NHS. Our app provides a user-friendly, interactive interface for the DES, including instructions for use and documentation, allowing NHS staff to experiment with model parameters and generate immediate results without the need to download and install software. The model can also be adapted to other specialties.

The model is documented using STRESS reporting guidelines [20], available in supplementary material 1.

### Data and Setting

NBT serves a population of approximately 1-million people, with an age-profile in line with England. Routinely collected data from the NHS Trust was used to identify patients receiving elective joint replacement between January 2016 and December 2019.

The Trust’s electronic health records (EHR) were used to identify elective joint replacements using a combination of OPCS4 procedure and surgical site codes (Supplementary material 2). Five core elective orthopedic surgical procedure types were identified and verified. A small number of short day-case ‘hip resurfacing’ surgeries [n=52] were removed from the dataset as they rarely utilize bed capacity. The five remaining surgical types were classified into two classes: (I) *Primary* [87%]: (primary hip replacement [p-THR n=3057; 51%], primary knee replacement [p-TKR; n=2302; 38%], uni-compartmental knee replacement [p-UKR; n=679; 11%]); (II) *Revision* [13%]: (revision hip replacement [r-THR; n=482; 55%], revision knee replacement [r-TKR; n=392; 45%]). Most patients did not remain in hospital once they were medically fit for discharge, however a proportion of patients in the EHR had a recorded *medically fit for discharge* date which preceded their actual discharge date (n=529; 7.6%).

The DES requires parameters describing patient lengths-of-stay, hence statistical probability distributions were fitted to each category of surgical procedure using the EHR data. The length-of-stay parameters [procedure, mean days ( $\mu$ ), standard deviation days ( $sd$ )] are: p-THR,  $\mu=4.4$ ,  $sd=2.9$ ; p-TKR,  $\mu=4.7$ ,  $sd=2.8$ ; p-UKR,  $\mu=2.9$ ,  $sd=2.1$ ; r-THR,  $\mu=6.9$ ,  $sd=7.0$ ; r-TKR,  $\mu=7.2$ ,  $sd=7.6$ ; delayed discharge,  $\mu=16.5$ ;  $sd=15.1$ ), which are converted to lognormal parameters within the model. The mean lengths-of-stay are high against national benchmarks, and a key focus of future activity is to reduce lengths-of-stay [12, 23].

### Orthopaedic surgical pathway

The DES model is a simplified, high-level representation of the system of interest, which simulates individual patient flow through the system over time. Our model assumes an infinite waiting list. Baseline surgical theatre scheduling rules define how patients enter the simulation model according to their surgical class (Primary or Revision). Baseline rules are:

- Three theatre sessions per day, five days per week with no weekend activity.
- Morning and afternoon sessions schedule either: one Revision *or* two Primary surgeries.
- Evening session schedules one Primary surgery.

Baseline resources for the model are 40 beds and 4 theatres. The DES samples a length-of-stay for each simulated patient from a lognormal distribution with parameters calculated from the previously fitted distributions by procedure type. A length-of-stay is sampled for delayed patients. The simulation can be run using baseline parameters, and additional scenarios can be run by changing these parameters to determine the effects on model outputs, primarily surgical throughput. Figure 1 shows the organisation of surgical activity and ward stay.

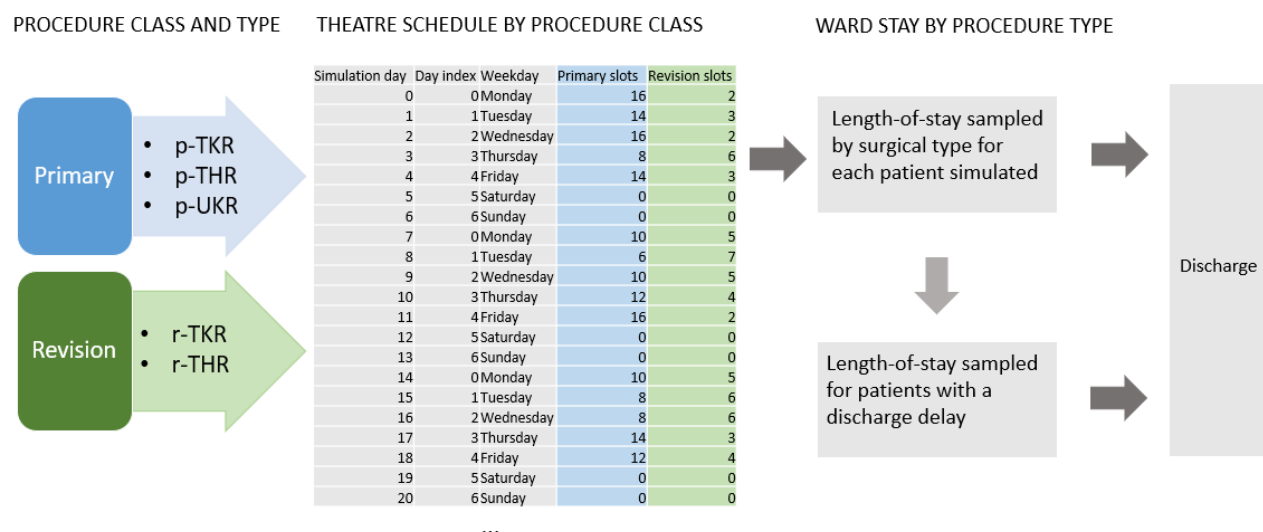

Figure 1: Conceptual organisation of ring-fenced orthopaedic activity and ward stay

## Model objectives

With the overall objective of maximising surgical throughput, the effects of changing model inputs can be investigated alone or in combination as experimental scenarios. These include:

- The number of theatres;
- The number of ring-fenced beds;
- Patient lengths-of-stay, including delayed discharges;
- Proportion of patients with a delayed discharge;
- Effects of running evening or weekend theatre sessions;
- Changes to surgical scheduling, for example scheduling revision surgery (with longer, more variable lengths-of-stay) earlier in the week.

These questions are all in line with GIRFT priorities, which include accepting day surgery as default (where a bed is available as back-up), improving theatre utilisation and best practice care, and focused enhanced recovery. Higher surgical volumes, dedicated theatre teams, and enhanced post-operative recovery is expected to improve patient outcomes. In turn, it is expected that lengths-of-stay will reduce, and standardised clinical pathways and discharge planning are likely to reduce discharge delays [12, 20].

The model outputs:

- *Total surgical throughput.* The primary goal of central capital funding allocations is to efficiently maximize surgical throughput [14], so the configuration which best achieves this - within other constraints relevant to service planners such as workforce availability [21] - is a key output.
- *Bed utilisation per day of week.* For each experimental scenario, mean bed utilisation (occupancy) is outputted daily over model runtime. While there is no ideal average bed utilisation figure (which is dependent upon many factors), it is commonly accepted that mean occupancies greater than 85-90%

can expect regular bed crises [22]. The results of excessive bed utilisation in the model can be seen as ‘lost slots’, where no bed is available for a patient scheduled for surgery. An additional consideration is that GIRFT recommend the extension of therapy services to support patient mobility goals toward discharge on any day with elective operating [20]. Therefore, theatre scheduling decisions (e.g., 5-7 day service) are dependent upon the availability of weekend staff.

- *Lost theatre slots for system reasons.* While beds are protected from outlying emergency admissions in a ring-fenced scenario, the balance of beds to theatre activity is a critical question. In the model, where patients are scheduled to arrive for surgery but no bed is available, the theatre slot is lost. In reality, other system behaviours will account for some of these lost slots. For example, the slot may be lost for patient reasons such as illness (i.e. the patient doesn’t attend for surgery or is deemed not fit for surgery at the point of admission); bed management activities may free up beds; or patients may be transferred to the acute hospital. In the model, lost slots (per day of week) are an indication of a mismatch between demand (theatre scheduling) and capacity (bed utilisation). In NBT, an average of 4.75 slots are lost per week for patient reasons, and a further 2.5 for system reasons.

## Patient and public involvement

Patients and the public were consulted in a workshop for suggestions and comments to inform the development of the grant that supported this work, and a further workshop informed scenarios used in model development.

## Role of the funding source

The funders had no role in any of the following: the study design; the collection, analysis, and interpretation of data; the writing of the report; the decision to submit the paper for publication.

## RESULTS

A set of 72 indicative experimental parameter configurations were investigated (summarised in Table 1) and described here:

Bed numbers between 30 and 70 beds (in increments of 5 beds; a total of 9 bed parameters) were investigated with each of two theatre schedules. The Baseline theatre schedule is as described in the Methods section, with 5-day working. The Baseline + weekend schedule uses the same daily theatre allocations and theatre numbers, with 7-day working. For each of these parameter changes, four scenarios were run for lengths-of-stay (baseline, 25% baseline) and for proportion delayed (baseline, 25% baseline). This totals 72 combinations.

Table 1: Summary of scenarios varying procedure lengths-of-stay (los), bed numbers, proportion of patients with a delayed discharge (prop), and daily theatre schedule.

| Scenario   | Length-of-stay (los): 2 parameters | Proportion delayed (prop): 2 parameters | Beds: 9 parameters          | Schedule: 2 parameters         |
|------------|------------------------------------|-----------------------------------------|-----------------------------|--------------------------------|
| Scenario 1 | Baseline                           | Baseline                                | 30 – 70 (in intervals of 5) | Baseline<br>Baseline + weekend |
| Scenario 2 | 0.25x Baseline                     | 0.25x Baseline                          | 30 – 70 (in intervals of 5) | Baseline<br>Baseline + weekend |
| Scenario 3 | Baseline                           | 0.25x Baseline                          | 30 – 70 (in intervals of 5) | Baseline<br>Baseline + weekend |
| Scenario 4 | 0.25x Baseline                     | Baseline                                | 30 – 70 (in intervals of 5) | Baseline<br>Baseline + weekend |

The baseline procedure lengths-of-stay and proportion of patients with a delayed discharge are historical values described in the Methods section. As a goal of capacity planning is to reduce lengths-of-stay and delayed discharge, these are considered maximum values (high\_los, prop\_high), with minimum values set at 25% of baseline (low\_los, prop\_low). In all cases, the length-of-stay parameters for those patients with a discharge delay remain at the baseline value.

The results are plotted in Figure 2. The top row displays the mean total daily surgical throughput for each scenario, and for each theatre schedule. The middle row is mean daily bed utilisation. The bottom row displays ‘lost slots’, estimating the extent of the mismatch between patients scheduled and beds available.

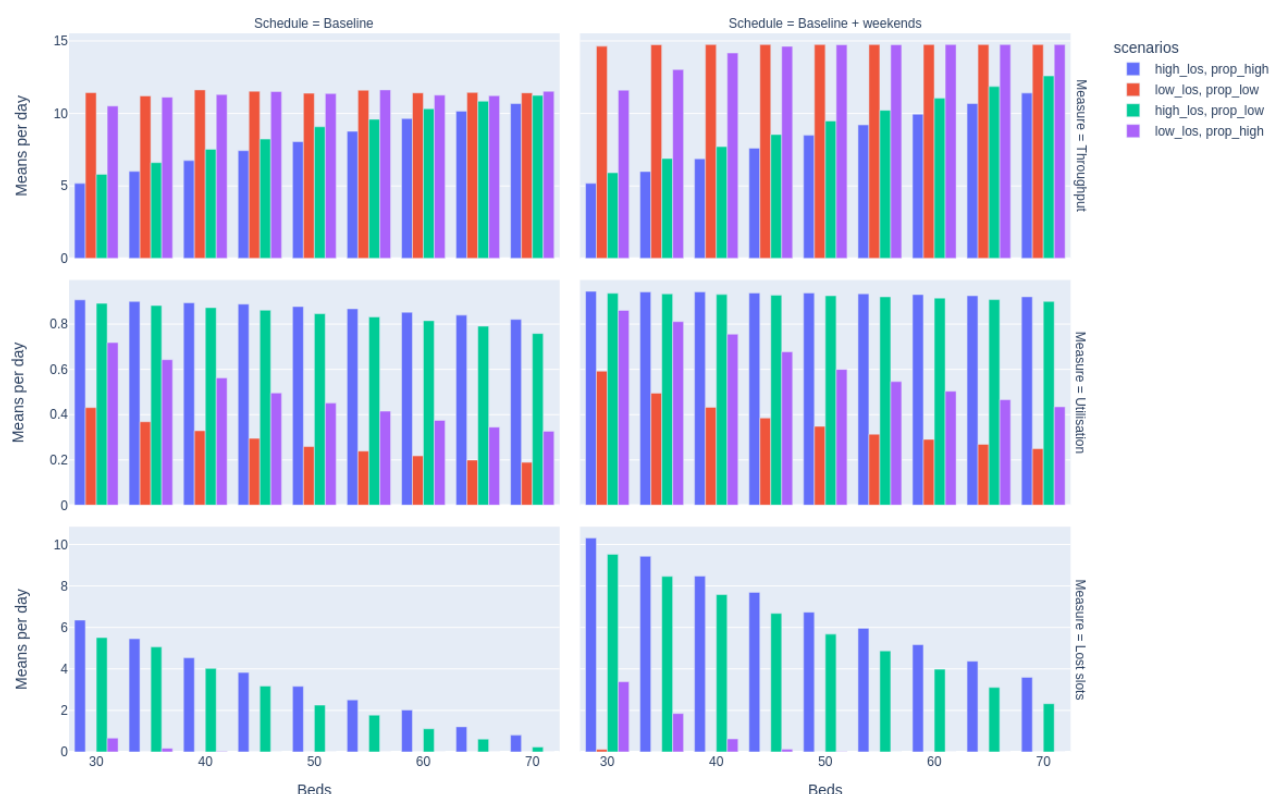

Figure 2: Results of simulations across 30-70 beds, for each of 2 theatre schedules with 4 combinations of lengths-of-stay (baseline:high\_los; baseline x0.25: low\_los) and proportion delayed (baseline:prop\_high; baseline x0.25: prop\_low) for mean daily total surgical throughput, bed utilisation, and lost slots.

The results show that the system is more sensitive to changes in procedure lengths-of-stay than to changes in the proportion of patients delayed, despite the long mean lengths-of-stay for delayed patients. At current procedure lengths-of-stay (high\_los), bed utilisation is high with both current and reduced delayed discharges (Scenarios 1 and 3). With reduced lengths-of-stay, the effects of reducing delayed discharges on required bed numbers is more significant, substantially reducing bed utilisation.

In the case of no weekend activity, a higher number of beds (65-70) than the proposed value (40 beds) will be required if lengths-of-stay remain unchanged. At this level of bed utilisation, reducing delayed discharges has little impact on required bed numbers. However, reducing lengths-of-stay in line with national benchmarks has enough impact on bed utilisation to allow for additional theatre activity.

Where lengths-of-stay can be reduced, weekend operating theatre activity (remaining at 4 theatres) increases surgical throughput, and beds remain underutilised in all cases above 40 beds. Reducing the proportion of patients with delayed discharge further reduces bed requirements to approximately 30 beds. Where lengths-of-stay remain at baseline values, weekend theatre activity cannot be considered, as bed utilisation and resultant



lost slots are unacceptably high, even up to 70 beds. Users can investigate scenarios between these extreme values to gain realistic expectations of required bed and theatre numbers.

## DISCUSSION

Our generalisable, open access application allows those involved in planning the development and utilisation of ring-fenced elective orthopaedic units to rapidly model different scenarios to predict delivery of elective surgical care. The model is adaptable to use local data for other units to model likely scenarios when planning activity. With minimal adaptation, it can also be applied to the delivery of other types of elective surgery.

Our experimental scenarios found that reducing lengths-of-stay in line with national benchmarks can increase surgical throughput and allow for additional theatre activity given the bed and theatre numbers initially proposed. We investigated weekend working, but the model also allows estimates to be obtained for increased theatre numbers, increased theatre utilisation (more procedures per day), and changes to theatre activity (e.g., scheduling more complex surgery early in the week). However, if lengths-of-stay remain unchanged, proposed bed numbers in this instance will be inadequate. As procedure lengths-of-stay reduce, the effects of reducing the number of patients with a delayed discharge also become more significant. Reducing the length of the delay will similarly reduce bed utilisation and increase throughput, and the results of this can also be investigated using the simulation model.

A strength of simulation modelling is the use of underlying stochastic distributions using real-world data, as planning by average occupancy will not provide adequate reserve capacity to manage the variation seen in patient lengths-of-stay [25]. Our open approach to modeling is a further strength, as a range of scenario combinations can be investigated by users to support planning using the web app. Additionally, the model is available for re-use either through re-parameterisation or adaptation. There are limitations to the use of simulation modeling. Assumptions and simplifications are required to convert a real-world problem into a computer representation. We assume that all historical (pre-pandemic) lengths-of-stay distributions fit current lengths-of-stay for baseline modelling. We do not account for patient frailty or other patient attributes beyond length-of-stay and the proportion of delayed discharges, and it is possible that patients who have been delayed are more complex. Additionally, our theatre scheduling rules include only the five main elective orthopaedic procedures. While other procedures may utilize theatre activity, they are not accounted for in bed planning, although simpler procedures will more likely to be performed as day cases, and more complex procedures (such as spinal surgery) will be performed in a main hospital setting with high dependency facilities.

Previous modelling and simulation work has focused on resource sharing for elective and non-elective joint replacement [17] and detailed studies of individual orthopaedic services [18, 23]. Although the need for reusable models for orthopaedic wait list planning is recognised [24], no free and open-source models to support resourcing and efficiency of elective services have been found. Our model provides quantitative outputs estimating the effects on surgical throughput (per procedure); daily bed utilisation of changes to bed and theatre capacity, theatre scheduling, patient lengths-of-stay and discharge delays; and lost theatre slots, representing system pressure on beds. The model is intended for use by health services planners and clinicians, and is available as a free web-app to address usability and accessibility of results. It is being used to evidence service configurations for the business case in NBT, and is more widely applicable.

## CONCLUSIONS

Post-pandemic, pressure to restore elective surgeries against new interim national targets necessitates efficient and effective use of allocated public funds. This planning is happening rapidly, and on a large scale across the UK. Simulation modelling offers an effective method for planning elective services, identifying a balance of capacity across theatres and beds, and predicting the impact of productivity measures on capacity requirements. The model developed in this study is being used to provide quantitative support for accessing central capital funds, enabling discussion and evidence for the most efficient use of new resourcing. The model has been

developed to offer a transferable solution for supporting both orthopaedic elective recovery, and with minor adaptations, recovery of other elective services.

### Data availability statement

Data may be obtained from a third party and are not publicly available. The data used in the study are collected by the North Bristol NHS Trust (NBT) as part of their care and support. Sharing of anonymised data with the University of Bristol was underpinned by a data sharing agreement and solely covers the purposes of this study. Data requests can be made through the NBT.

Code, input parameters and output data used for results in this paper are available on GitHub: [AliHarp/HEP: Model of orthopaedic ward \(github.com\)](#) and are permanently archived using Zenodo ([HEP | Zenodo](#)). All are licensed using MIT permissive license [MIT License | Choose a License](#).

### Patient consent for publication

Not applicable.

### Ethics approval

We were provided with pseudonymised North Bristol Trust hospital admissions data under the NIHR ARC West Partnership Agreement. The project received ethical approval from the University of Bristol Faculty of Health Sciences ethical review board on 3 November 2020 (ref# 109024).

### Funding

This study was funded by the Health Data Research (HDR) UK South West Better Care Partnership (#6.12). AH, TM and MP are supported by the National Institute for Health Research Applied Research Collaboration South West Peninsula. RW, EE, TJ and MTR's time was supported by the National Institute for Health Research Applied Research Collaboration West (NIHR ARC West). AJ, MW, AB and CP were supported by the NIHR Biomedical Research Centre at University Hospitals Bristol and Weston NHS Foundation Trust and the University of Bristol. The views expressed in this publication are those of the author(s) and not necessarily those of the National Institute for Health Research or the Department of Health and Social Care.

### Competing interests None declared

**Contributors** AH drafted the original manuscript. AH, TM, and MP developed the model. All authors contributed to the conception and planning of this project and all reviewed and revised the manuscript. MTR and AJ supervised the project. MTR is the guarantor for the project.

### REFERENCES

- [1] Meara, J.G., Leather, A.J., Hagander, L., Alkire, B.C., Alonso, N., Ameh, E.A., Bickler, S.W., Conteh, L., Dare, A.J., Davies, J. and Mérisier, E.D., 2015. Global Surgery 2030: evidence and solutions for achieving health, welfare, and economic development. *The lancet*, 386(9993), pp.569-624.
- [2] The Kings Fund. 2021. Waiting times for elective (non-urgent) treatment: referral to treatment (RTT) Available at: [Waiting times for elective \(non-urgent\) treatment: referral to treatment \(RTT\) | The King's Fund \(kingsfund.org.uk\)](#)
- [3] Alderson, D., 2018. Winter pressures that last all year. *The Bulletin of the Royal College of Surgeons of England*, 100(2), pp.53-53.
- [4] Lan, R.H., Yu, J., Samuel, L.T., Pappas, M.A., Brooks, P.J. and Kamath, A.F., 2020. How are we measuring cost-effectiveness in total joint arthroplasty studies? Systematic review of the literature. *The Journal of arthroplasty*, 35(11), pp.3364-3374.



- [5] Kapstad, H., Rustøen, T., Hanestad, B.R., Moum, T., Langeland, N. and Stavem, K., 2007. Changes in pain, stiffness and physical function in patients with osteoarthritis waiting for hip or knee joint replacement surgery. *Osteoarthritis and cartilage*, 15(7), pp.837-843.
- [6] Scott, C.H., MacDonald, D.J. and Howie, C.R., 2019. 'Worse than death' and waiting for a joint arthroplasty. *The bone & joint journal*, 101(8), pp.941-950.
- [7] Lau, R.L., Perruccio, A.V., Gandhi, R. and Mahomed, N.N., 2012. The role of surgeon volume on patient outcome in total knee arthroplasty: a systematic review of the literature. *BMC musculoskeletal disorders*, 13(1), pp.1-10.
- [8] Pamilo, K.J., Peltola, M., Mäkelä, K., Häkkinen, U., Paloneva, J. and Remes, V., 2013. Is hospital volume associated with length-of-stay, re-admissions and reoperations for total hip replacement? A population-based register analysis of 78 hospitals and 54,505 replacements. *Archives of orthopaedic and trauma surgery*, 133, pp.1747-1755.
- [9] Sayers, A., Steele, F., Whitehouse, M.R., Price, A., Ben-Shlomo, Y. and Blom, A.W., 2020. Association between surgical volume and failure of primary total hip replacement in England and Wales: findings from a prospective national joint replacement register. *BMJ open*, 10(9), p.e033045.
- [10] GIRFT. 2015. A national review of adult elective orthopaedic services in England GETTING IT RIGHT FIRST TIME. Available at: [Layout 1 \(gettingitrightfirsttime.co.uk\)](https://www.gettingitrightfirsttime.co.uk/layout1)
- [11] GIRFT. 2020. Getting it Right in Orthopaedics: A follow-up on the GIRFT national specialty report on orthopaedics. Available at: [Layout 1 \(gettingitrightfirsttime.co.uk\)](https://www.gettingitrightfirsttime.co.uk/layout1)
- [12] Wall, J., Ray, S. and Briggs, T.W., 2022. Delivery of elective care in the future. *Future healthcare journal*, 9(2), p.144.
- [13] Pietrzak, J.R.T., Maharaj, Z., Erasmus, M., Sikhauli, N., Cakic, J.N. and Mokete, L., 2021. Pain and function deteriorate in patients awaiting total joint arthroplasty that has been postponed due to the COVID-19 pandemic. *World Journal of Orthopedics*, 12(3), p.152.
- [14] NHS. 2022. Delivery Plan for Tackling the Covid-19 backlog of elective care. Available at: <https://www.england.nhs.uk/coronavirus/wp-content/uploads/sites/52/2022/02/C1466-delivery-plan-for-tackling-the-covid-19-backlog-of-elective-care.pdf>
- [15] Mohiuddin, S., Gardiner, R., Crofts, M., Muir, P., Steer, J., Turner, J., Wheeler, H., Hollingworth, W. and Horner, P.J., 2020. Modelling patient flows and resource use within a sexual health clinic through discrete event simulation to inform service redesign. *BMJ open*, 10(7), p.e037084.
- [16] Allen, M., Pearn, K., Monks, T., Bray, B.D., Everson, R., Salmon, A., James, M. and Stein, K., 2019. Can clinical audits be enhanced by pathway simulation and machine learning? An example from the acute stroke pathway. *BMJ open*, 9(9), p.e028296.
- [17] Persson, M., Hvitfeldt-Forsberg, H., Unbeck, M., Sköldenberg, O.G., Stark, A., Kelly-Pettersson, P. and Mazzocato, P., 2017. Operational strategies to manage non-elective orthopaedic surgical flows: a simulation modelling study. *BMJ open*, 7(4), p.e013303.
- [18] Anderson, G.H., Jenkins, P.J., McDonald, D.A., Van Der Meer, R., Morton, A., Nugent, M. and Rymaszewski, L.A., 2017. Cost comparison of orthopaedic fracture pathways using discrete event simulation in a Glasgow hospital. *BMJ open*, 7(9), p.e014509.
- [19] Monks, T., Currie, C.S., Onggo, B.S., Robinson, S., Kunc, M. and Taylor, S.J., 2019. Strengthening the reporting of empirical simulation studies: Introducing the STRESS guidelines. *Journal of Simulation*, 13(1), pp.55-67.

- [20] GIRFT. 2023. Orthopaedic Elective Surgery Guide to delivering perioperative ambulatory care for patients with hip and knee pain requiring joint replacement surgery. Available at: [SWAOC-Hip-and-Knee-Delivery-Guide-March-2023-FINAL-V1-1.pdf \(gettingitrightfirsttime.co.uk\)](#)
- [21] Mahase, E., 2022. Health leaders question absence of workforce strategy in NHS elective care recovery plan.
- [22] Bain, C.A., Taylor, P.G., McDonnell, G. and Georgiou, A., 2010. Myths of ideal hospital occupancy. *Medical Journal of Australia*, 192(1), pp.42-43.
- [23] Baril, C., Gascon, V. and Cartier, S., 2014. Design and analysis of an outpatient orthopaedic clinic performance with discrete event simulation and design of experiments. *Computers & Industrial Engineering*, 78, pp.285-298.
- [24] Boyle, L. and Mackay, M., 2022, December. A Reusable Discrete Event Simulation Model for Improving Orthopedic Waiting Lists. In *2022 Winter Simulation Conference (WSC)* (pp. 973-984). IEEE.
- [25] Monks, T., Worthington, D., Allen, M., Pitt, M., Stein, K. and James, M.A., 2016. A modelling tool for capacity planning in acute and community stroke services. *BMC health services research*, 16(1), pp.1-8.
